# Supplementary material
Source: PubMed Central journal article supplement (PMC7363152)
Supplement: supp_RA119.012386_157832_3_supp_536981_qxznxg.pdf [file supp_RA119.012386_157832_3_supp_536981_qxznxg.pdf]

**APP amyloidogenic processing is enhanced in the brains of Alcadin  $\alpha$ -deficient mice**

**Naoya Gotoh<sup>1</sup>, Yuhki Saito<sup>1</sup>, Saori Hata<sup>1</sup>, Haruka Saito<sup>1</sup>, Daiki Ojima<sup>2</sup>, Chiaki Murayama<sup>1,2</sup>, Mayo Shigeta<sup>3</sup>, Takaya Abe<sup>3,4</sup>, Daijiro Konno<sup>5</sup>, Fumio Matsuzaki<sup>5</sup>, Toshiharu Suzuki<sup>1\*</sup> and Tohru Yamamoto<sup>1,2</sup>,**

From the <sup>1</sup>Laboratory of Neuroscience, Graduate School of Pharmaceutical Sciences, Hokkaido University, Sapporo, Japan; <sup>2</sup>Department of Molecular Neurobiology, Faculty of Medicine, Kagawa University, Miki-cho, Japan; <sup>3</sup>Laboratories for Animal Resource Development; <sup>4</sup>Genetic Engineering; <sup>5</sup>Cell Asymmetry, RIKEN Center for Biosystems Dynamics Research, Kobe, Japan.

Running title: *Alcadin  $\alpha$  deficiency enhances APP amyloidogenic processing*

\* To whom correspondence should be addressed:

**Toshiharu Suzuki** (tsuzuki@pharm.hokudai.ac.jp; +81-11-706-3250)

**Tohru Yamamoto** (tohru@med.kagawa-u.ac.jp; +81-87-891-2251)

List of material included:

Supplemental Figure 1 to 5 and the figure legends

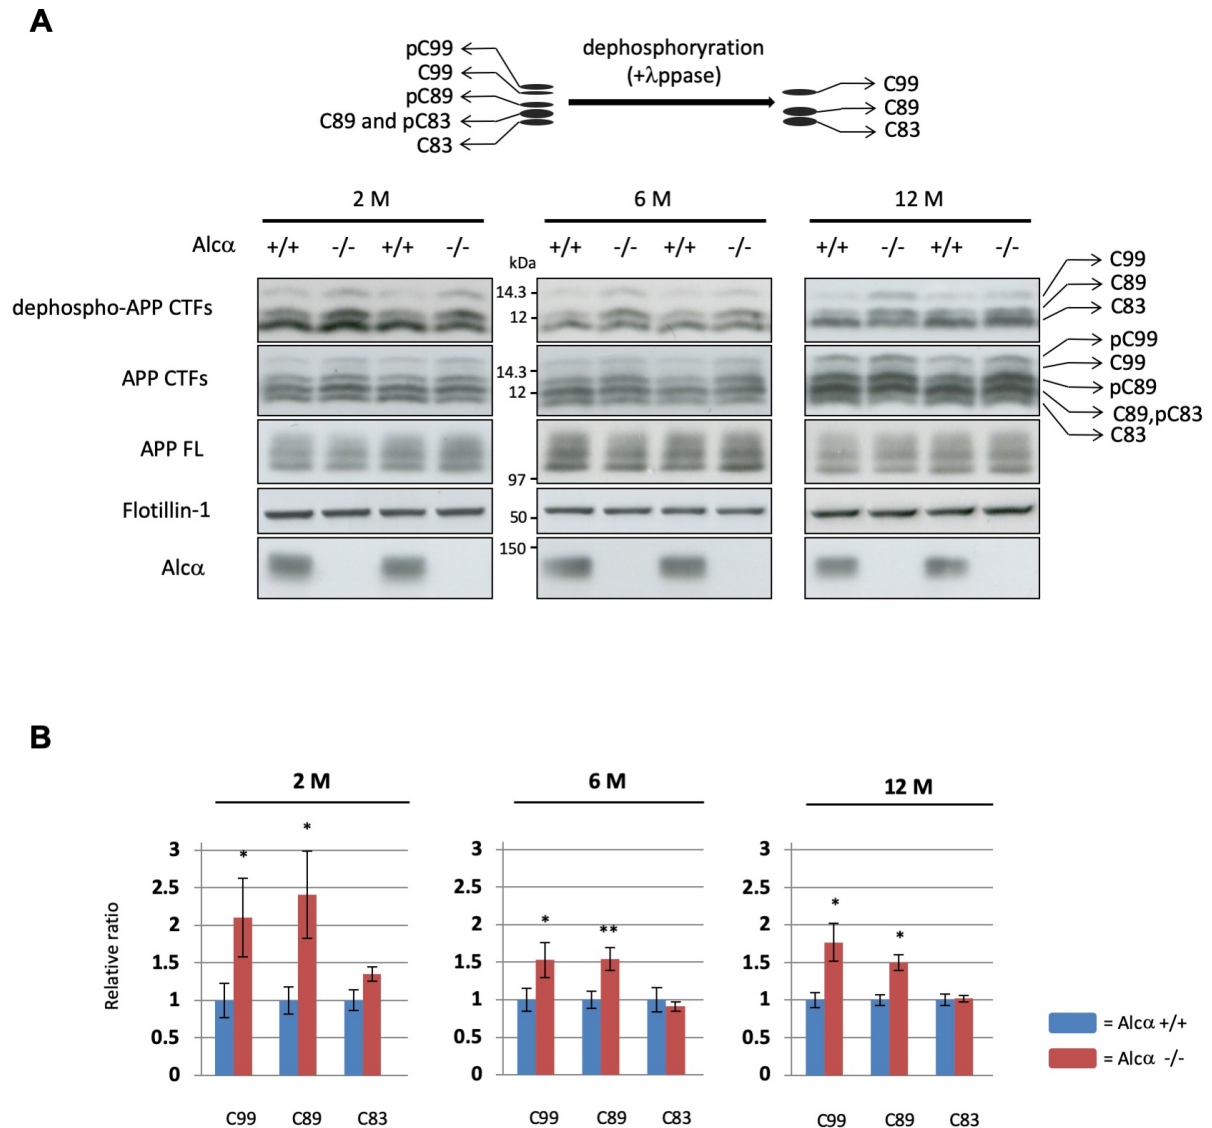

**Supplemental Figure 1.  $\beta$ -site cleavages of APP in the brains of Alca-deficient mice with age.**

(A) Immunoblot analyses of APP and APP CTFs with schematic representation of electrophoresis patterns of naïve and dephosphorylated APP CTFs. Membrane fraction (5  $\mu$ g) or 15  $\mu$ g (for CTFs) of the hippocampus and cerebral cortex of wild-type (+/+) and homozygous mutant (-/-) mice of indicated ages were analyzed in 8% or 15% (for CTFs) resolving gels with anti-APP, anti-Alca, and anti-Flotillin-1 antibodies.

(B) Band densities for wild-type (blue columns) and Alca-deficient (red columns) mice were standardized to the density of Flotillin-1, and the value of wild-type was assigned as a reference value of 1.0. C99, CTF $\beta$ ; C89, CTF $\beta'$ ; C83, CTF $\alpha$  of APP CTFs (n = 5 mice per group, except 12 months-old Alca-deficient mice (4 mice)); unpaired t-test, \*,  $p < 0.05$ ; \*\*,  $p < 0.01$ ). The error bars indicate S.E.

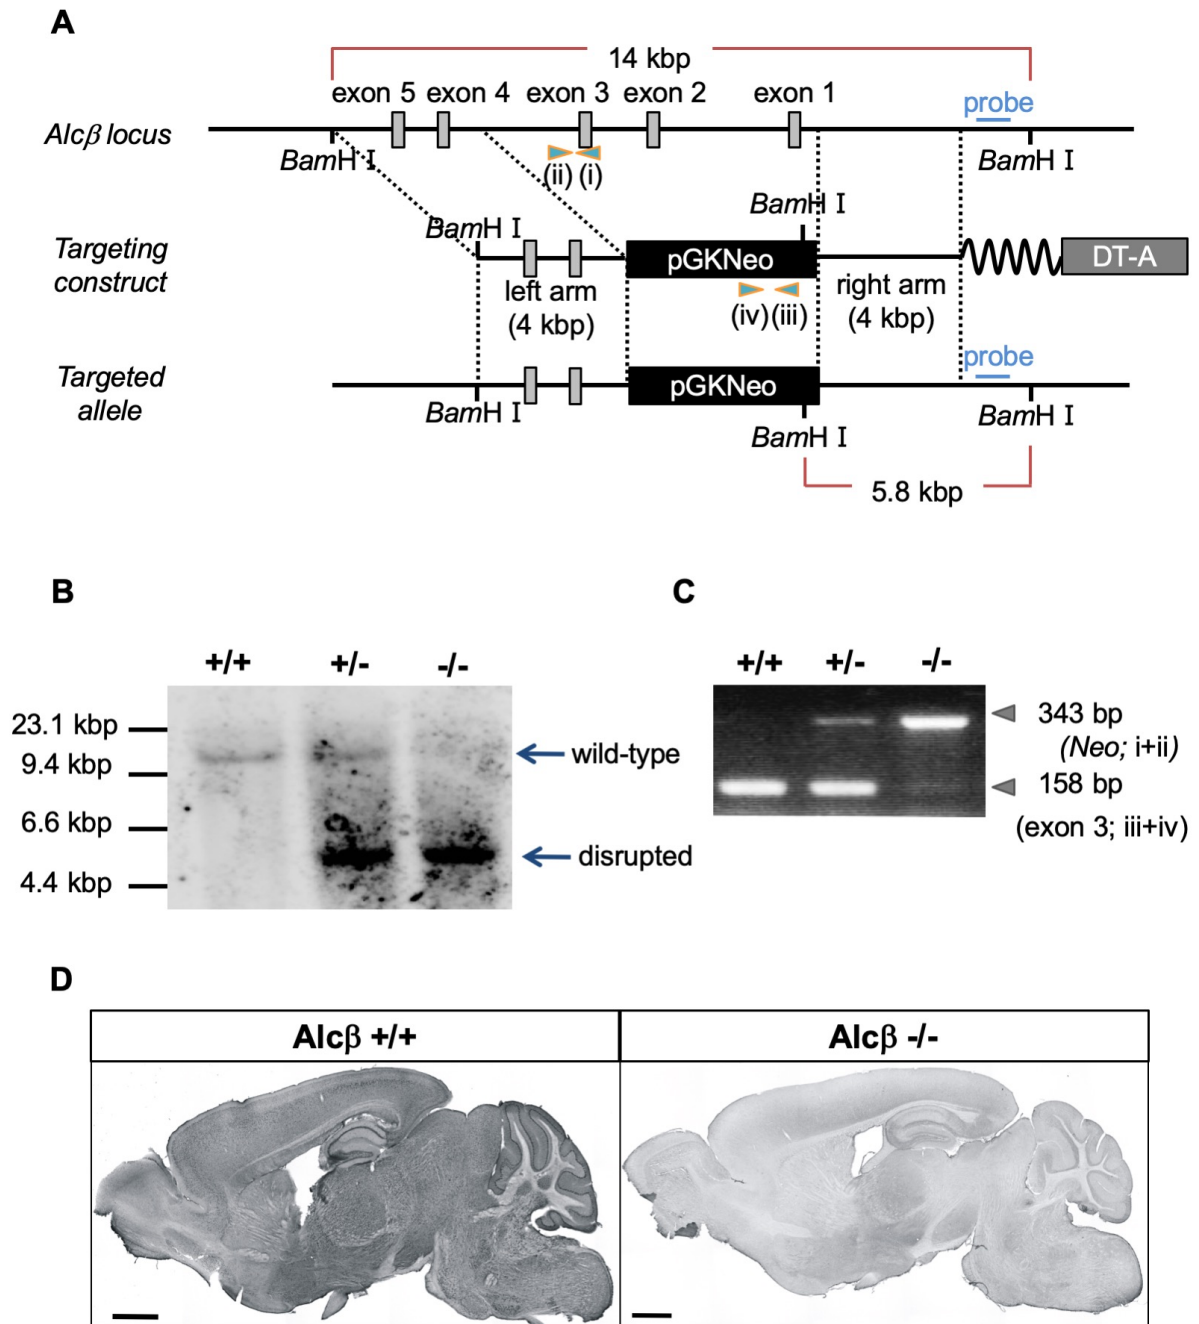

**Supplemental Figure 2. Generation of *Alcb*-deficient mice.**

(A) Gene-targeting procedure. Schematic of the structure of the *Alcb* gene including exon 1-5, targeting construct, and targeted allele.

(B) Southern blot analysis. Probes indicated in (A) were used to detect wild-type (14 kbp) and targeted (5.8 kbp) fragments.

(C) PCR products specific to the wild-type allele (+/+) generated with primers (i plus ii, 416 bp) and to the targeted allele (-/-) generated with primers (ii plus iii, 1224 bp) were analyzed by agarose gel electrophoresis.

(D) Immunostaining of sagittal sections of wild-type (+/+) and homozygous mutant (-/-) mouse (2-3 months old) brains with anti-*Alcb* antibody. Scale bar indicates 1 mm.

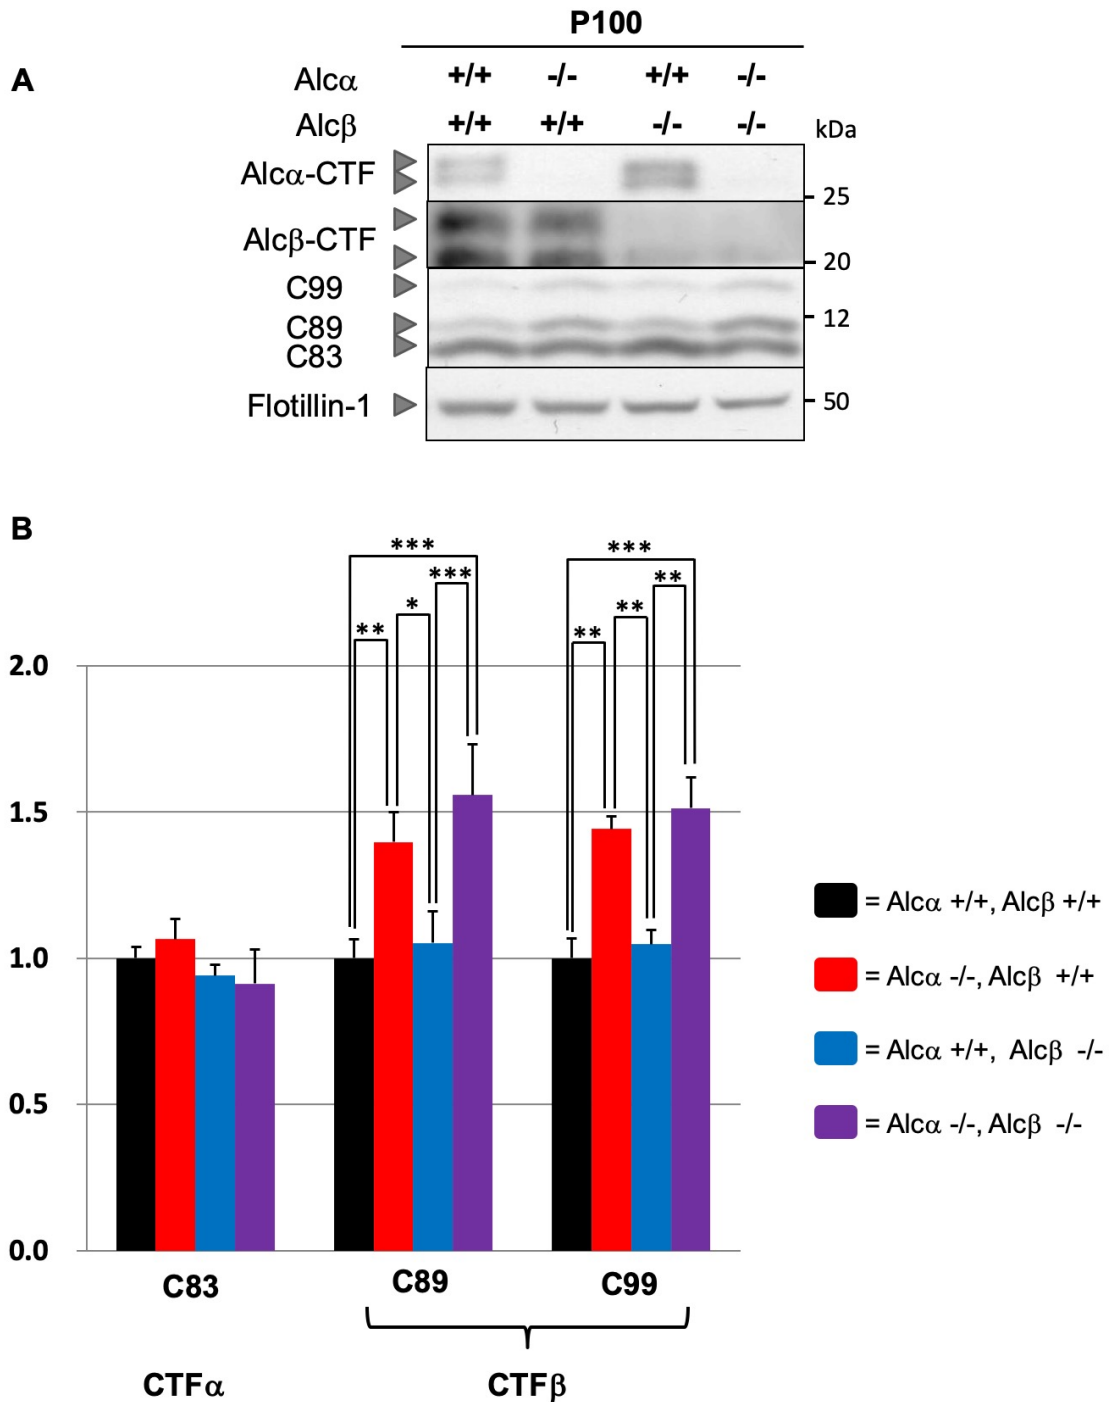

**Supplemental Figure 3. Alcα-, but not Alcβ-deficient mice showed significant alterations in amyloidogenic processing of APP.**

(A) Immunoblot analysis of APP CTFs in Alcα- or Alcβ-deficient mice. A total of 15 μg of membrane fraction of the hippocampus and cerebral cortex of wild-type (+/+) and homozygous mutant (-/-) mice (12 months old) were analyzed in 15% resolving gel with anti-APP, anti-Alcα, and anti-flotillin antibodies. Alcα CTF exhibited double bands in these electrophoresis conditions.

(B) Band densities of APP CTFs for wild-type (black columns) and Alcα and/or Alcβ-deficient (colored columns) 12-month-old mice were standardized to the density of flotillin-1, and the value of wild-type was assigned a reference value of 1.0. C99, CTFβ; C89, CTFβ'; C83, CTFα of APP CTFs (n = 4 mice; 2-way ANOVA, Tukey's posthoc test, \*p < 0.05, \*\*p < 0.01, and \*\*\*p < 0.001.). The error bars indicate S.E.

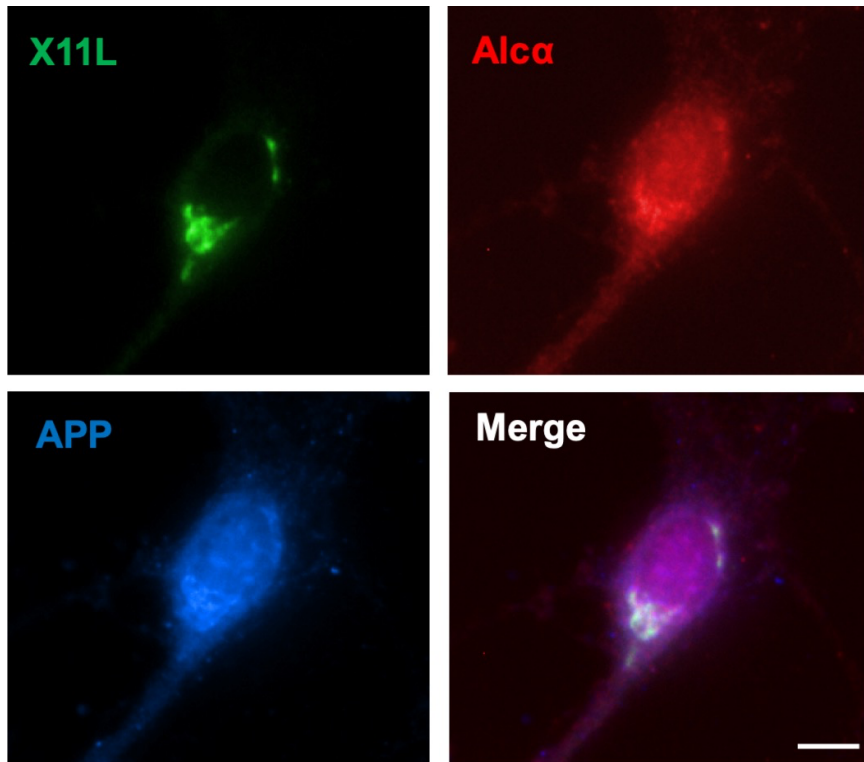

**Supplemental Figure 4. Subcellular localizations of X11L, APP, and Alca in a primary cultured cortical neuron.**

Fixed mouse primary cultured cortical neurons were simultaneously labeled with mouse anti-X11L, rabbit anti-APP, and guinea pig anti-Alca antibodies. Their co-localization is observed especially around peri-nuclear structures. Scale bar: 10 $\mu$ m.

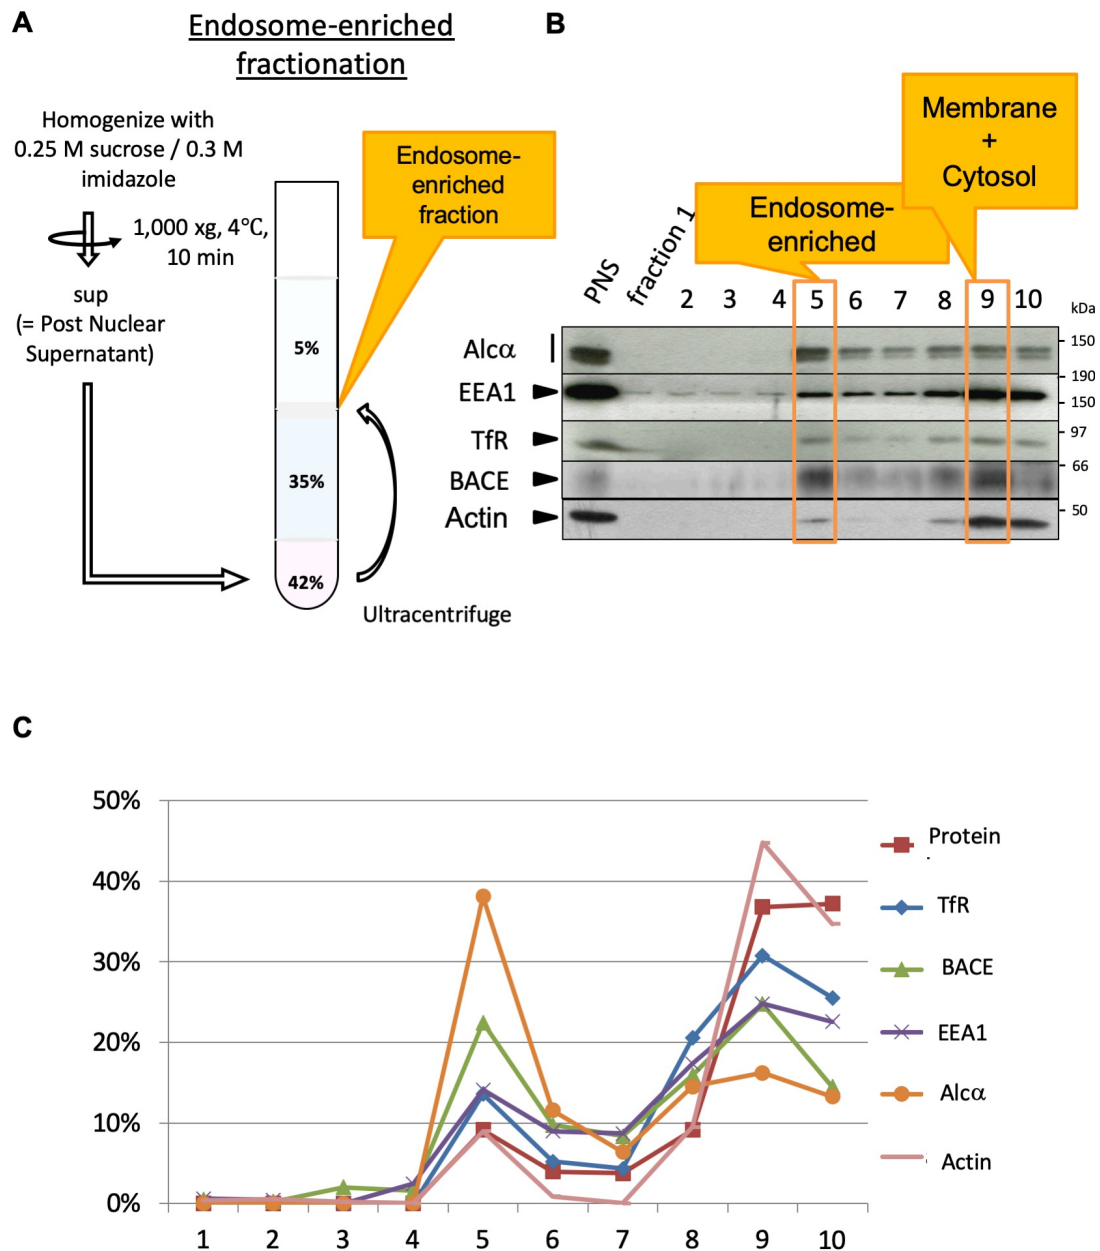

**Supplemental Figure 5. Fractionation of post-nuclear supernatants of mouse brains.**

(A) Preparation of endosome-enriched membranes. Light membranes containing early endosomes with Golgi and other membranes accumulated underneath the interface between 5% and 35% sucrose layers after ultracentrifugation. Very light membrane largely composed of late endosomes enter the 5% sucrose layer, and heavy membrane with cytosolic proteins containing plasma membrane and rough endoplasmic reticulum membrane reside in the 42.5% sucrose layer.

(B) Typical isolation profile of wild-type mouse brain homogenate.

(C) Distribution of proteins in the fractionation ~10% of proteins are in the endosome-enriched light membrane fraction with EEA1 and BACE1.
